# Supplementary material
Source: Research Square preprint supplement (doi:10.21203/rs.3.rs-9904409/v1)
Supplement: Supplementary file 1 [file 17cb3f810d25a082dc207248.docx]

**Supplementary Information for:**

**“Forest growth strengthens diversity effects on multitrophic interactions”**

**Authors**: Massimo Martini1,2*, Felix Fornoff1, Finn Rehling1, Ming-Qiang Wang2, Georg Albert3, Helge Bruelheide4,5, Jing-Ting Chen2, Guo-Ai Chen2, Christina Grozinger6, Peng-Fei Guo7, Shi-Kun Guo2, Shan Li8, Yi Li8, Michael Orr9, Manuela Sann10, Bernhard Schmid11, Xiaoyu Shi2, Michael Staab12, Juan-Juan Yang2, Qing-Song Zhou2, Arong Luo2†, Xiaojuan Liu8†, Chao-Dong Zhu2†, Alexandra-Maria Klein1†

**Corresponding author:** massimo.martini@nature.uni-freiburg.de

**Supplementary Tables**

**Table S1: Species list and abundance (number of brood cells) of cavity-nesting host and natural enemy species (parasites, parasitoids and kleptoparasites) observed in BEF-China from 2014 – 2023 (site A and B).** Species are ordered by decreasing occurrence, hosts additionally by functional group (pollen-collecting bee, carnivore-hunting wasp, herbivore-hunting wasp).

| Fun. group | Host species | Abund. |  | Natural enemy species | Abund. |
| --- | --- | --- | --- | --- | --- |
| bee | *Hoplitis carinotarsa* | 5163 |  | *Chrysis principalis* | 2909 |
| bee | *Megachile spissula* | 2614 |  | *Amobia auriceps* | 2092 |
| bee | *Megachile sculpturalis* | 2496 |  | *Melittobia sosui* | 907 |
| bee | *Megachile strupigera* | 2031 |  | *Lycogaster violaceipennis* | 801 |
| bee | *Osmia taurus* | 1173 |  | *Amobia* sp.1 | 553 |
| bee | *Heriades sauteri* | 1127 |  | *Melittobia* sp.1 | 275 |
| bee | *Megachile rixator* | 956 |  | Ichneumonidae sp.3 | 261 |
| bee | *Trachusa staabi* | 336 |  | *Anthrax aygula* | 156 |
| bee | *Megachile disjunctiformis* | 324 |  | Torymidae sp.1 | 99 |
| bee | *Megachile pseudomonticola* | 306 |  | *Leucospis japonica* | 96 |
| bee | *Hylaeus* sp.1 | 233 |  | *Picardiella melanoleuca* | 83 |
| bee | *Megachile abluta* | 218 |  | *Euaspis basalis* | 79 |
| bee | *Megachile monticola* | 65 |  | *Melittobia* sp.2 | 73 |
| bee | *Megachile dinura* | 33 |  | *Coelioxys fenestrata* | 66 |
| bee | *Hylaeus* sp.2 | 3 |  | Chrysidinae sp.1 | 58 |
| carn. hunter | *Auplopus carbonarius* | 1490 |  | Braconidae sp.1 | 55 |
| carn. hunter | *Auplopus kuarensis* | 965 |  | *Coelioxys crassiventris* | 50 |
| carn. hunter | *Auplopus* sp.2 | 840 |  | *Melittobia clavicornis* | 47 |
| carn. hunter | *Trypoxylon bicolor* | 593 |  | *Aleiodes* sp.1 | 46 |
| carn. hunter | *Auplopus* sp.6 | 452 |  | *Primeuchroeus kansitakuanus* | 46 |
| carn. hunter | *Deuteragenia ossarium* | 386 |  | *Cordyligaster* sp.1 | 43 |
| carn. hunter | *Sceliphron deforme* | 369 |  | *Microgaster* sp.1 | 38 |
| carn. hunter | *Auplopus* sp.3 | 325 |  | Phoridae sp.1 | 38 |
| carn. hunter | *Auplopus* sp. 8 | 297 |  | *Dusona* sp.1 | 35 |
| carn. hunter | *Pison atripenne* | 255 |  | *Coelioxys* sp.4 | 34 |
| carn. hunter | *Auplopus* sp.4 | 254 |  | *Copidosoma nacoleiae* | 33 |
| carn. hunter | *Chalybion japonicum* | 148 |  | *Coelioxys brevicaudata* | 32 |
| carn. hunter | Pompilidae sp.1 | 95 |  | Eulophidae sp.1 | 32 |
| carn. hunter | *Trypoxylon schmiedeknechtii* | 78 |  | *Euaspis* sp.1 | 29 |
| carn. hunter | *Deuteragenia* sp.2 | 77 |  | *Trichrysis cyanea* | 28 |
| carn. hunter | *Pison* sp.1 | 47 |  | *Miltogramma* sp.1 | 22 |
| carn. hunter | *Auplopus* sp.11 | 30 |  | *Eurytoma* sp.1 | 21 |
| carn. hunter | *Pisoxylon* sp.1 | 28 |  | Sarcophagidaesp.4 | 18 |
| carn. hunter | *Auplopus* sp.1 | 21 |  | Ichneumonidae sp.1 | 17 |
| carn. hunter | *Auplopus* sp.7 | 20 |  | *Senotainia* sp.1 | 16 |
| carn. hunter | *Auplopus* sp.9 | 14 |  | *Leucospis* sp.1 | 15 |
| carn. hunter | *Auplopus* sp.13 | 13 |  | *Gasteruption corniculigerum* | 14 |
| carn. hunter | *Auplopus* sp.5 | 10 |  | *Microgaster* sp.2 | 13 |
| carn. hunter | *Auplopus* sp.12 | 8 |  | *Skeatia* sp.1 | 12 |
| carn. hunter | *Tachypompilus* sp1 | 6 |  | *Zonitis japonica* | 12 |
| carn. hunter | *Trypoxylon malaisei* | 5 |  | *Apanteles* sp.1 | 11 |
| herb. hunter | *Anterhynchium flavomarginatum* | 26269 |  | *Kocourekia* sp.1 | 11 |
| herb. hunter | *Orancistrocerus drewseni* | 1499 |  | *Picardiella* sp.1 | 11 |
| herb. hunter | *Epsilon fujianensis* | 1239 |  | Braconidae sp.7 | 11 |
| herb. hunter | *Pareumenes quadrispinosus* | 1075 |  | Ichneumonidae sp.8 | 10 |
| herb. hunter | *Isodontia nigella* | 434 |  | *Belvosia* sp.1 | 9 |
| herb. hunter | *Allorhynchium chinense* | 424 |  | *Lycogaster flavonigrata* | 9 |
| herb. hunter | *Discoelius nigridypeus* | 150 |  | Mutillidae sp.1 | 8 |
| herb. hunter | *Discoelius wangi* | 139 |  | Sarcophagidae sp.2 | 8 |
| herb. hunter | *Eumenes quadratus* | 126 |  | Strepsiptera | 8 |
| herb. hunter | *Subancistrocerus kankauensis* | 126 |  | Torymidaesp.2 | 8 |
| herb. hunter | *Euodynerus quadrifasciatus* | 125 |  | *Argyrophylax* sp.1 | 7 |
| herb. hunter | *Polemistus* sp.1 | 124 |  | Ichneumonidae sp.7 | 7 |
| herb. hunter | *Euodynerus notatus* | 108 |  | Anthomyiidae sp.1 | 6 |
| herb. hunter | *Stenodynerus chinensis chinensis* | 104 |  | Braconidae sp.3 | 6 |
| herb. hunter | *Passaloecus insignis* | 85 |  | Ichneumonidae sp. | 6 |
| herb. hunter | *Orancistrocerus aterrimus* | 80 |  | Bombyliidae sp.1 | 5 |
| herb. hunter | Eumeninae sp.2 | 62 |  | *Chrysis angolensis* | 5 |
| herb. hunter | *Pararrhynchium ornatum ornatum* | 51 |  | *Chrysura* sp.1 | 5 |
| herb. hunter | *Eumenes sillicus* | 28 |  | Dermestidae | 5 |
| herb. hunter | *Discoelius* sp.1 | 22 |  | Fanniidae sp.1 | 5 |
| herb. hunter | Eumeninae sp.4 | 16 |  | *Miltogramma* sp.2 | 5 |
| herb. hunter | *Rhopalum* sp.1 | 14 |  | Perilampidae sp.1 | 5 |
| herb. hunter | *Ancistrocerus* Sp.1 | 10 |  | Sarcophagidae sp.1 | 5 |
| herb. hunter | Eumenidae sp.8 | 10 |  | *Atylostoma towadensis* | 4 |
| herb. hunter | Eumeninae sp.3 | 9 |  | Ceratopogonidae sp.1 | 4 |
| herb. hunter | *Nitela* sp.2 | 7 |  | *Chaenotetrastichus semiflavus* | 4 |
| herb. hunter | *Eumenes* sp.1 | 5 |  | Chrysidinae sp.2 | 4 |
| herb. hunter | Eumeninae sp.1 | 5 |  | *Chrysura koma* | 4 |
| herb. hunter | Eumeninae sp. | 4 |  | Eulophidae sp.2 | 4 |
| herb. hunter | *Nitela* sp.1 | 4 |  | *Eurytoma* sp.3 | 4 |
| herb. hunter | *Eumenes Labiatus* | 2 |  | Ichneumonidae sp.6 | 4 |
| herb. hunter | *Okinawepipona Kogimai* | 2 |  | *Yelicones belokobylskiji* | 4 |
| herb. hunter | Eumeninae Sp.5 | 1 |  | Ichneumonidae sp.11 | 3 |
| herb. hunter | *Zeta* Sp1 | 1 |  | Ichneumonidae sp.12 | 3 |
|  |  |  |  | *Nemorilla floralis* | 3 |
|  |  |  |  | *Perilampidae* sp.2 | 3 |
|  |  |  |  | Braconid sp.3 | 2 |
|  |  |  |  | Braconidae sp.2 | 2 |
|  |  |  |  | Chrysidinae sp.3 | 2 |
|  |  |  |  | *Comastichus zopheros* | 2 |
|  |  |  |  | *Eurytoma* sp.2 | 2 |
|  |  |  |  | Ichneumonidae sp.2 | 2 |
|  |  |  |  | Leucospidae sp.1 | 2 |
|  |  |  |  | *Melittobia assemi* | 2 |
|  |  |  |  | Mutillidae sp.2 | 2 |
|  |  |  |  | *Sarcophaga albiceps* | 2 |
|  |  |  |  | Sarcophagidae sp.3 | 2 |
|  |  |  |  | Sarcophagidae sp.5 | 2 |
|  |  |  |  | Tachinidae sp.1 | 2 |
|  |  |  |  | Tachinidae sp.2 | 2 |
|  |  |  |  | Bombyliidae sp.2 | 1 |
|  |  |  |  | Braconid sp.2 | 1 |
|  |  |  |  | Braconidae sp.5 | 1 |
|  |  |  |  | Braconidae sp.4 | 1 |
|  |  |  |  | Chalcidoidea sp.1 | 1 |
|  |  |  |  | *Chrysis lamellata* | 1 |
|  |  |  |  | *Chrysis* sp.1 | 1 |
|  |  |  |  | *Coelioxys* sp.1 | 1 |
|  |  |  |  | *Coelioxys* sp.3 | 1 |
|  |  |  |  | *Coelioxys* sp.5 | 1 |
|  |  |  |  | Dolichogenidea sp.1 | 1 |
|  |  |  |  | Ichneumonidae sp.10 | 1 |
|  |  |  |  | Ichneumonidae sp.9 | 1 |
|  |  |  |  | Leucospis sp.2 | 1 |
|  |  |  |  | *Macrosiagon nasutum* | 1 |
|  |  |  |  | *Melittobia australica* | 1 |
|  |  |  |  | *Miltogramma* sp.3 | 1 |
|  |  |  |  | Muscidae sp.1 | 1 |
|  |  |  |  | *Omalus pseudoimbecillus* | 1 |
|  |  |  |  | Phoridae sp.2 | 1 |
|  |  |  |  | *Pseudomalus joannis* | 1 |
|  |  |  |  | Braconidae sp.6 | 1 |
|  |  |  |  | Ripiphoridae sp.1 | 1 |
|  |  |  |  | *Senometopia* sp.1 | 1 |
|  |  |  |  | *Skeatia* sp.2 | 1 |

**Table S2 : List of cavity-nesting host and natural enemy taxonomic families and respective number of brood cells reared and species richness.** In total, 56,264 insects belonging to 75 cavity-nesting species were reared into adults from 28,854 individual nests collected over the span of ten calendar years (2014-2023). An overall parasitism rate of 14.5% was recorded, with 9,530 brood cells attached by 116 parasitoid species.

|  | **Group** | **Species richness** | **Total brood cell number** | **Families represented** | **Dominant species** |
| --- | --- | --- | --- | --- | --- |
| **HOSTS** | Bees | 15 | 17,078 | Colletidae; Megachilidae | *Hoplitis carinotarsa*;  *Megachile spissula*;  *Megachile sculpturalis* |
| Wasps | 60 | 39,186 | Vespidae; Crabronidae; Sphecidae; Pemphredonidae; Pompilidae | *Anterhynchium flavomarginatum*;  *Orancistrocerus drewseni*;  *Auplopus carbonarius* |
| **ENEMIES** | Bees | 9 | 292 | Megachilidae | *Euaspis basalis*;  *Coelioxys fenestrata*;  *Coelioxys crassiventris* |
| Wasps | 72 | 6,197 | Braconidae; Chalcidoidea; Chrysididae; Encytridae; Eulophidae; Eurytomidae; Gasteruptiidae; Ichneumonidae; Leucospidae; Mutillidae; Perilampidae; Torymidae; Trigonalidae | *Chrysis principalis*;  *Melittobia sosui*;  *Lycogaster violaceipennis* |
| Flies | 29 | 3,014 | Anthomyiidae; Bombyliidae; Ceratopogonidae; Fanniidae; Muscidae; Phoridae; Sarcophagidae; Tachinidae | *Amobia auriceps*;  *Amobia sp.;*  *Anthrax aygula* |
| Beetles | 5 | 19 | Dermestidae, Meloidae, Rhipiphoridae | *Zonitis japonica;*  *Dermestidae sp.;*  *Macrosiagon nasutum* |
| Strepsiptera | 1 | 8 | Stylopidae | *Stylopidae sp* |

**Table S3: Summary statistics of generalized linear mixed models assessing diversity effects across trophic levels during ten years of young forest development (N = 792).** “Design”, only study design variables of tree species richness and stand age; “design + stand biomass” includes stand volume and interaction with stand age as predictor; “full”, global model; “parsimonious”, global model with non-significant interactions removed.

| **Term** | **Estimate** | | **Std. Error** | | **Statistic** | | **P value** | | **Sig.** | |
| --- | --- | --- | --- | --- | --- | --- | --- | --- | --- | --- |
| **Host species richness – design** – AIC 3510 | | | | | | | | | | |
| (Intercept) | 1.70 | | 0.084 | | 20.2 | | <0.001 | | *** | |
| Tree richness | 0.081 | | 0.021 | | 3.83 | | <0.001 | | *** | |
| Stand age | 0.011 | | 0.053 | | 0.203 | | 0.839 | |  | |
| Tree richness x Stand age | 0.023 | | 0.013 | | 1.79 | | 0.073 | | . | |
| **Host species richness – design + stand biomass** – AIC 3460 | | | | | | | | | | |
| (Intercept) | 1.77 | 0.079 | | 22.4 | | <0.001 | | *** | |
| Tree richness | 0.061 | 0.019 | | 3.2 | | 0.001 | | ** | |
| Stand volume | 0.207 | 0.029 | | 7.04 | | <0.001 | | *** | |
| Stand age | -0.092 | 0.069 | | -1.34 | | 0.181 | |  | |
| Tree richness x Stand age | 0.015 | 0.014 | | 1.11 | | 0.265 | |  | |
| Stand volume x Stand age | -0.137 | 0.021 | | -6.50 | | <0.001 | | *** | |
| **Host species richness – full** – AIC 3300 | | | | | | | | | |
| (Intercept) | 1.73 | 0.08 | | 21.60 | | <0.001 | | *** | |
| Tree richness | 0.056 | 0.017 | | 3.30 | | <0.001 | | *** | |
| Tree FD | -0.00007 | 0.016 | | -0.0047 | | 0.996 | |  | |
| Stand volume | 0.111 | 0.023 | | 4.78 | | <0.001 | | *** | |
| Stand age | -0.071 | 0.050 | | -1.41 | | 0.158 | |  | |
| Host abundance | 0.182 | 0.014 | | 13.30 | | <0.001 | | *** | |
| Slope | 0.0229 | 0.014 | | 1.62 | | 0.106 | |  | |
| Elevation | -0.0438 | 0.018 | | -2.41 | | 0.016 | | * | |
| Eastness | 0.007 | 0.014 | | 0.516 | | 0.606 | |  | |
| Northness | -0.01 | 0.014 | | -0.722 | | 0.470 | |  | |
| Tree richness x Stand age | 0.014 | 0.013 | | 1.10 | | 0.270 | |  | |
| Stand volume x Stand age | -0.069 | 0.019 | | -3.59 | | <0.001 | | *** | |
| **Host species richness – parsimonious** (non-sig. interactions removed)– AIC 3300 | | | | | | | | | |
| (Intercept) | 1.73 | 0.079 | | 22.0 | | <0.001 | | *** | |
| Tree richness | 0.054 | 0.017 | | 3.21 | | 0.001 | | ** | |
| Tree FD | 0.001 | 0.016 | | 0.047 | | 0.962 | |  | |
| Stand volume | 0.115 | 0.023 | | 4.97 | | <0.001 | | *** | |
| Stand age | -0.071 | 0.05 | | -1.44 | | 0.151 | |  | |
| Host abundance | 0.182 | 0.014 | | 13.3 | | <0.001 | | *** | |
| Slope | 0.022 | 0.014 | | 1.56 | | 0.119 | |  | |
| Elevation | -0.042 | 0.018 | | -2.33 | | 0.020 | | * | |
| Eastness | 0.007 | 0.014 | | 0.533 | | 0.594 | |  | |
| Northness | -0.010 | 0.014 | | -0.747 | | 0.455 | |  | |
| Stand volume x Stand age | -0.066 | 0.0191 | | -3.46 | | <0.001 | | *** | |
| **Host abundance – design** – AIC 8270 | | | | | | | | | |
| (Intercept) | 4.38 | 0.109 | | 40.1 | | <0.001 | | *** | |
| Tree richness | 0.118 | 0.038 | | 3.12 | | 0.002 | | ** | |
| Stand age | 0.095 | 0.088 | | 1.09 | | 0.276 | |  | |
| Tree richness x Stand age | 0.013 | 0.020 | | 0.639 | | 0.523 | |  | |
| **Host abundance – design + stand biomass** – AIC 8210 | | | | | | | | | |
| (Intercept) | 4.49 | 0.118 | | 38.2 | | <0.001 | | *** | |
| Tree richness | 0.09 | 0.037 | | 2.41 | | 0.016 | | * | |
| Stand volume | 0.361 | 0.054 | | 6.74 | | <0.001 | | *** | |
| Stand age | -0.087 | 0.121 | | -0.714 | | 0.475 | |  | |
| Tree richness x Stand age | 0.003 | 0.021 | | 0.142 | | 0.887 | |  | |
| Stand volume x Stand age | -0.271 | 0.034 | | -7.94 | | <0.001 | | *** | |
| **Host abundance – full** – AIC 8200 | | | | | | | | | |
| (Intercept) | 4.50 | 0.158 | | 28.4 | | <0.001 | | *** | |
| Tree richness | 0.072 | 0.04 | | 1.80 | | 0.072 | | . | |
| Tree FD | 0.099 | 0.037 | | 2.65 | | 0.008 | | ** | |
| Stand volume | 0.339 | 0.050 | | 6.73 | | <0.001 | | *** | |
| Stand age | -0.103 | 0.115 | | -0.894 | | 0.371 | |  | |
| Slope | 0.070 | 0.034 | | 2.08 | | 0.038 | | * | |
| Elevation | -0.162 | 0.044 | | -3.70 | | <0.001 | | *** | |
| Eastness | -0.002 | 0.033 | | -0.076 | | 0.940 | |  | |
| Northness | -0.072 | 0.033 | | -2.18 | | 0.029 | | * | |
| Tree richness x Stand age | 0.005 | 0.020 | | 0.269 | | 0.788 | |  | |
| Stand volume x Stand age | -0.261 | 0.034 | | -7.67 | | <0.001 | | *** | |
| **Host abundance – parsimonious** (non-sig. interactions removed)– AIC 8200 | | | | | | | | | |
| (Intercept) | 4.50 | 0.158 | | 28.6 | | <0.001 | | *** | |
| Tree richness | 0.071 | 0.040 | | 1.79 | | 0.074 | | . | |
| Tree FD | 0.099 | 0.037 | | 2.66 | | 0.008 | | ** | |
| Stand volume | 0.343 | 0.049 | | 6.98 | | <0.001 | | *** | |
| Stand age | -0.103 | 0.115 | | -0.90 | | 0.368 | |  | |
| Slope | 0.070 | 0.034 | | 2.06 | | 0.039 | | * | |
| Elevation | -0.162 | 0.044 | | -3.69 | | <0.001 | | *** | |
| Eastness | -0.002 | 0.033 | | -0.071 | | 0.943 | |  | |
| Northness | -0.072 | 0.033 | | -2.19 | | 0.029 | | * | |
| Stand volume x Stand age | -0.261 | 0.034 | | -7.65 | | <0.001 | | *** | |
| **Parasitoid species richness – design** – AIC 3170 | | | | | | | | | |
| (Intercept) | 1.10 | 0.084 | | 13.1 | | <0.001 | | *** | |
| Tree richness | 0.139 | 0.032 | | 4.32 | | <0.001 | | *** | |
| Stand age | -0.101 | 0.075 | | -1.34 | | 0.181 | |  | |
| Tree richness x Stand age | 0.034 | 0.018 | | 1.86 | | 0.062 | | . | |
| **Parasitoid species richness – design + stand biomass** – AIC 3130 | | | | | | | | | |
| (Intercept) | 1.19 | 0.103 | | 11.5 | | <0.001 | | *** | |
| Tree richness | 0.110 | 0.028 | | 3.92 | | <0.001 | | *** | |
| Stand volume | 0.275 | 0.043 | | 6.45 | | <0.001 | | *** | |
| Stand age | -0.306 | 0.095 | | -3.21 | | 0.001 | | ** | |
| Tree richness x Stand age | 0.018 | 0.019 | | 0.905 | | 0.365 | |  | |
| Stand volume x Stand age | -0.164 | 0.031 | | -5.32 | | <0.001 | | *** | |
| **Parasitoid species richness – full** – AIC 2870 | | | | | | | | | |
| (Intercept) | 1.06 | 0.079 | | 13.5 | | <0.001 | | *** | |
| Tree richness | 0.068 | 0.022 | | 3.04 | | 0.002 | | ** | |
| Tree FD | 0.004 | 0.022 | | 0.186 | | 0.853 | |  | |
| Stand volume | 0.108 | 0.033 | | 3.26 | | 0.001 | | ** | |
| Stand age | -0.204 | 0.072 | | -2.84 | | 0.004 | | ** | |
| Host richness | 0.122 | 0.023 | | 5.39 | | <0.001 | | *** | |
| Host abundance | 0.266 | 0.021 | | 12.9 | | <0.001 | | *** | |
| Tree richness x Stand age | 0.010 | 0.017 | | 0.599 | | 0.549 | |  | |
| Stand volume x Stand age | -0.014 | 0.027 | | -0.509 | | 0.610 | |  | |
| Stand age x Host abundance | -0.063 | 0.020 | | -3.190 | | 0.001 | | ** | |
| Stand age x Host richness | -0.020 | 0.021 | | -0.985 | | 0.325 | |  | |
| **Parasitoid species richness – parsimonious** (non-sig. interactions removed)– AIC 2870 | | | | | | | | | |
| (Intercept) | 1.05 | 0.076 | | 13.9 | | <0.001 | | *** | |
| Tree richness | 0.065 | 0.022 | | 2.92 | | 0.003 | | ** | |
| Tree FD | 0.002 | 0.022 | | 0.103 | | 0.918 | |  | |
| Stand volume | 0.102 | 0.025 | | 4.00 | | <0.001 | | *** | |
| Stand age | -0.202 | 0.068 | | -2.95 | | 0.003 | | ** | |
| Host richness | 0.125 | 0.022 | | 5.63 | | <0.001 | | *** | |
| Host abundance | 0.269 | 0.020 | | 13.3 | | <0.001 | | *** | |
| Stand age x Host abundance | -0.072 | 0.017 | | -4.22 | | <0.001 | | *** | |
| **Parasitoid abundance – design** – AIC 5370 | | | | | | | | | |
| (Intercept) | 2.36 | 0.135 | | 17.5 | | <0.001 | | *** | |
| Tree richness | 0.188 | 0.046 | | 4.1 | | <0.001 | | *** | |
| Stand age | -0.0002 | 0.119 | | -0.002 | | 0.999 | |  | |
| Tree richness x Stand age | 0.064 | 0.024 | | 2.64 | | 0.008 | | ** | |
| **Parasitoid abundance – design + stand biomass** – AIC 5340 | | | | | | | | | |
| (Intercept) | 2.44 | 0.179 | | 13.7 | | <0.001 | | *** | |
| Tree richness | 0.139 | 0.041 | | 3.38 | | <0.001 | | *** | |
| Stand volume | 0.403 | 0.063 | | 6.43 | | <0.001 | | *** | |
| Stand age | -0.228 | 0.163 | | -1.40 | | 0.163 | |  | |
| Tree richness x Stand age | 0.027 | 0.025 | | 1.05 | | 0.293 | |  | |
| Stand volume x Stand age | -0.18 | 0.041 | | -4.37 | | <0.001 | | *** | |
| **Parasitoid abundance – full**– AIC 4690 | | | | | | | | | |
| (Intercept) | 2.16 | 0.125 | | 17.2 | | <0.001 | | *** | |
| Tree richness | 0.017 | 0.029 | | 0.598 | | 0.550 | |  | |
| Tree FD | 0.026 | 0.028 | | 0.937 | | 0.349 | |  | |
| Stand volume | 0.079 | 0.042 | | 1.91 | | 0.057 | | . | |
| Stand age | 0.058 | 0.082 | | 0.702 | | 0.483 | |  | |
| Host richness | 0.050 | 0.024 | | 2.05 | | 0.040 | | * | |
| Host abundance | 0.213 | 0.025 | | 8.53 | | <0.001 | | *** | |
| Parasitoid richness | 0.510 | 0.025 | | 20.4 | | <0.001 | | *** | |
| Tree richness x Stand age | -0.002 | 0.018 | | -0.095 | | 0.925 | |  | |
| Stand volume x Stand age | 0.063 | 0.030 | | 2.08 | | 0.037 | | * | |
| Stand age x Host abundance | -0.033 | 0.024 | | -1.35 | | 0.177 | |  | |
| Stand age x Host richness | 0.028 | 0.022 | | 1.26 | | 0.206 | |  | |
| Stand age x Parasitoid richness | 0.066 | 0.022 | | 3.08 | | 0.002 | | ** | |
| **Parasitoid abundance – parsimonious** (non-sig. interactions removed) – AIC 4690 | | | | | | | | | |
| (Intercept) | 2.15 | 0.124 | | 17.4 | | <0.001 | | *** | |
| Tree richness | 0.018 | 0.029 | | 0.636 | | 0.525 | |  | |
| Tree FD | 0.027 | 0.028 | | 0.970 | | 0.332 | |  | |
| Stand volume | 0.078 | 0.041 | | 1.90 | | 0.058 | | . | |
| Stand age | 0.067 | 0.080 | | 0.831 | | 0.406 | |  | |
| Host richness | 0.055 | 0.024 | | 2.26 | | 0.024 | | * | |
| Host abundance | 0.201 | 0.023 | | 8.67 | | <0.001 | | *** | |
| Parasitoid richness | 0.513 | 0.024 | | 21.1 | | <0.001 | | *** | |
| Stand volume x Stand age | 0.064 | 0.030 | | 2.16 | | 0.031 | | * | |
| Stand age x Parasitoid richness | 0.056 | 0.017 | | 3.25 | | 0.001 | | ** | |
| **Parasitism rate – design** – AIC 4900 | | | | | | | | | |
| (Intercept) | -1.78 | 0.152 | | -11.7 | | <0.001 | | *** | |
| Tree richness | 0.088 | 0.031 | | 2.81 | | 0.005 | | ** | |
| Stand age | -0.039 | 0.100 | | -0.40 | | 0.691 | |  | |
| Tree richness x Stand age | 0.068 | 0.024 | | 2.82 | | 0.005 | | ** | |
| **Parasitism rate – design + stand biomass** – AIC 4870 | | | | | | | | | |
| (Intercept) | -1.83 | 0.178 | | -10.3 | | <0.001 | | *** | |
| Tree richness | 0.044 | 0.031 | | 1.43 | | 0.151 | |  | |
| Stand volume | 0.121 | 0.052 | | 2.30 | | 0.021 | | * | |
| Stand age | -0.092 | 0.098 | | -0.934 | | 0.350 | |  | |
| Tree richness x Stand age | 0.025 | 0.025 | | 0.986 | | 0.324 | |  | |
| Stand volume x Stand age | 0.083 | 0.042 | | 1.98 | | 0.047 | | * | |
| **Parasitism rate – design + stand biomass + host & parasitoid variables** – AIC 4690 | | | | | | | | | |
| (Intercept) | -1.90 | 0.137 | | -13.9 | | <0.001 | | *** | |
| Tree richness | 0.003 | 0.029 | | 0.096 | | 0.924 | |  | |
| Stand volume | 0.033 | 0.050 | | 0.665 | | 0.506 | |  | |
| Stand age | 0.031 | 0.079 | | 0.387 | | 0.698 | |  | |
| Host richness | -0.184 | 0.031 | | -5.92 | | <0.001 | | *** | |
| Parasitoid richness | 0.412 | 0.029 | | 14.0 | | <0.001 | | *** | |
| Tree richness x Stand age | 0.017 | 0.023 | | 0.716 | | 0.474 | |  | |
| Stand volume x Stand age | 0.122 | 0.039 | | 3.15 | | 0.002 | | ** | |
| Stand age x Host richness | 0.017 | 0.028 | | 0.614 | | 0.539 | |  | |
| Stand age x Parasitoid richness | 0.053 | 0.025 | | 2.15 | | 0.032 | | * | |
| **Parasitism rate – full** – AIC 4570 | | | | | | | | | |
| (Intercept) | -1.89 | 0.134 | | -14.1 | | <0.001 | | *** | |
| Tree richness | 0.007 | 0.032 | | 0.216 | | 0.829 | |  | |
| Tree FD | -0.011 | 0.031 | | -0.363 | | 0.717 | |  | |
| Stand volume | 0.088 | 0.048 | | 1.83 | | 0.067 | | . | |
| Stand age | 0.072 | 0.086 | | 0.834 | | 0.404 | |  | |
| Host abundance | -0.388 | 0.038 | | -10.3 | | <0.001 | | *** | |
| Host richness | -0.121 | 0.031 | | -3.91 | | <0.001 | | *** | |
| Parasitoid richness | 0.57 | 0.031 | | 18.3 | | <0.001 | | *** | |
| Stand age x Host abundance | 0.018 | 0.034 | | 0.534 | | 0.593 | |  | |
| Stand age x Host richness | 0.013 | 0.028 | | 0.465 | | 0.642 | |  | |
| Stand age x Parasitoid richness | 0.110 | 0.032 | | 3.41 | | <0.001 | | *** | |
| Stand volume x Stand age | 0.068 | 0.037 | | 1.85 | | 0.064 | | . | |
| Stand volume x Parasitoid richness | -0.099 | 0.031 | | -3.16 | | 0.002 | | ** | |
| Host abundance x Host richness | 0.109 | 0.024 | | 4.60 | | <0.001 | | *** | |
| **Parasitism rate – parsimonious** (non-sig. interactions removed) – AIC 4570 | | | | | | | | | |
| (Intercept) | -1.85 | 0.138 | | -13.4 | | <0.001 | | *** | |
| Tree richness | 0.005 | 0.032 | | 0.153 | | 0.878 | |  | |
| Tree FD | -0.005 | 0.031 | | -0.162 | | 0.872 | |  | |
| Stand volume | 0.153 | 0.033 | | 4.59 | | <0.001 | | *** | |
| Stand age | 0.031 | 0.089 | | 0.345 | | 0.730 | |  | |
| Host abundance | -0.389 | 0.036 | | -10.7 | | <0.001 | | *** | |
| Host richness | -0.127 | 0.031 | | -4.13 | | <0.001 | | *** | |
| Parasitoid richness | 0.566 | 0.031 | | 18.3 | | <0.001 | | *** | |
| Stand age x Parasitoid richness | 0.133 | 0.026 | | 5.01 | | <0.001 | | *** | |
| Stand volume x Parasitoid richness | -0.114 | 0.030 | | -3.76 | | <0.001 | | *** | |
| Host abundance x Host richness | 0.109 | 0.024 | | 4.60 | | <0.001 | | *** | |

**Table S4:** **Summary statistics of path analysis assessing bottom-up diversity effects across trophic levels from tree species richness to parasitism rate (N = 792).** ~ correlation was expected, not directional and not tested; Std. Error, standard error; Df, degrees of freedom; Std. Estimate, standardized path estimate.

| **Response** | **Predictor** | **Std. Error** | **P value** | **Std. Estimate** | **Sig.** |
| --- | --- | --- | --- | --- | --- |
| Parasitism | Par. rich.. | 0.032 | <0.001 | 0.948 | *** |
| Parasitism | Host rich. | 0.032 | <0.001 | -0.113 | *** |
| Parasitism | Host abund. | 0.036 | <0.001 | -0.666 | *** |
| Parasitism | Stand age | 0.079 | 0.075 | 0.141 |  |
| Parasitism | Tree rich. | 0.024 | 0.331 | 0.023 |  |
| Parasitism | Par. rich. x Stand age | 0.026 | 0.002 | 0.077 | ** |
| Parasitism | Stand age x Tree rich. | 0.023 | 0.019 | 0.054 | * |
| Par. rich. | Host rich. | 0.034 | <0.001 | 0.132 | *** |
| Par. rich. | Host abund. | 0.034 | <0.001 | 0.523 | *** |
| Par. rich. | Stand vol. | 0.034 | <0.001 | 0.198 | *** |
| Par. rich. | Stand age | 0.083 | <0.001 | -0.293 | *** |
| Par. rich. | Host abund. x Stand age | 0.028 | <0.001 | -0.139 | *** |
| Host rich. | Host abund. | 0.029 | <0.001 | 0.590 | *** |
| Host rich. | Stand vol. | 0.035 | <0.001 | 0.154 | *** |
| Host abund. | Stand vol. | 0.060 | <0.001 | 0.417 | *** |
| Host abund. | Stand age | 0.139 | 0.460 | -0.103 |  |
| Host abund. | Tree FD | 0.049 | 0.008 | 0.130 | ** |
| Host abund. | Stand vol. x Stand age | 0.039 | <0.001 | -0.199 | *** |
| Stand vol. | Tree rich. | 0.071 | <0.001 | 0.306 | *** |
| Stand vol. | Stand age | 0.032 | <0.001 | 0.485 | *** |
| Stand vol. | Tree rich.*Stand age | 0.011 | <0.001 | 0.171 | *** |
| Tree FD | Tree rich. | 0.022 | <0.001 | 0.739 | *** |
| ~~Stand vol. | ~~Parasitism | - | 0.009 | 0.083 | ** |
| ~~Tree FD | ~~Stand vol. | - | 0.442 | -0.005 |  |

**Table S5:** **Summary statistics of path analysis assessing mechanisms driving the temporal increase in the relationship between tree and parasitoid species richness with parasitism (N = 448).** Std. Error, standard error; Df, degrees of freedom; Std. Estimate, standardized path estimate.

| **Response** | **Predictor** | **Std. Error** | **P value** | **Std. Estimate** | **Sig.** |
| --- | --- | --- | --- | --- | --- |
| Parasitism | Niche overlap | 0.028 | <0.001 | 0.177 | *** |
| Parasitism | Focal par. rich. | 0.038 | 0.004 | 0.140 | ** |
| Parasitism | Par. rich. | 0.056 | <0.001 | 0.437 | *** |
| Parasitism | Host rich. | 0.031 | 0.222 | -0.048 |  |
| Parasitism | Host abund. | 0.037 | <0.001 | -0.660 | *** |
| Niche overlap | Focal par. rich. | 0.057 | <0.001 | 0.416 | *** |
| Niche overlap | Host rich. | 0.053 | <0.001 | -0.192 | *** |
| Niche overlap | Host abund. | 0.064 | 0.005 | 0.158 | ** |
| Niche overlap | Par. rich. | 0.090 | 0.584 | -0.029 |  |
| Focal par. rich. | Par. rich. | 0.067 | <0.001 | 0.533 | *** |
| Focal par. rich. | Host rich. | 0.040 | 0.089 | -0.066 |  |
| Focal par. rich. | Tree rich. | 0.032 | 0.388 | 0.029 |  |
| Focal par. rich. | Stand age | 0.132 | 0.036 | 0.320 | * |
| Focal par. rich. | Host abund. | 0.046 | 0.082 | 0.078 |  |
| Focal par. rich. | Par. rich. x Stand age | 0.052 | 0.023 | 0.123 | * |
| Focal par. rich. | Tree rich. x Stand age | 0.028 | 0.004 | 0.094 | ** |
| Par. rich. | Tree rich. | 0.023 | 0.004 | 0.107 | ** |
| Par. rich. | Stand age | 0.073 | 0.008 | -0.340 | ** |
| Par. rich. | Host abund. | 0.031 | <0.001 | 0.471 | *** |
| Par. rich. | Host rich. | 0.029 | 0.046 | 0.088 | * |

**Table S6: Sequential model comparisons for generalized linear mixed models.** Nested models were compared using Type I analysis of deviance to assess the sequential contribution of predictor blocks and interaction terms. Tables report the terms added at each step, AIC, likelihood-ratio χ² statistics (Chisq), degrees of freedom (DF) and associated P values.

| **Model** | **Terms added** | **AIC** | **Chi Df** | **Chisq** | **Pr(>Chisq)** | **Sig.** |
| --- | --- | --- | --- | --- | --- | --- |
| **Host species richness** (N = 792) | | | | | | |
| HR_M | Random factors: plot/site + site + year | 3520 | NA | NA |  |  |
| Model_1 | Tree rich. + Tree FD + Stand vol. + Stand age | 3500 | 4 | 29.600 | <0.001 | *** |
| Model_2 | Slope + Elevation + Eastness + Northness | 3490 | 4 | 17.500 | 0.002 | ** |
| Model_3 | Host abund. | 3310 | 1 | 181.000 | <0.001 | *** |
| Model_4 | Tree rich. x Stand age | 3310 | 1 | 0.339 | 0.560 |  |
| Model_5 | Stand vol. x Stand age | 3300 | 1 | 12.700 | <0.001 | *** |
| **Host species richness – design + stand biomass** (N = 792) | | | | | | |
| HR_M | Random factors: plot/site + site + year | 3520 | NA | NA |  |  |
| Model_1 | Tree rich. | 3510 | 1 | 13.900 | <0.001 | *** |
| Model_2 | Stand age | 3510 | 1 | 0.056 | 0.812 |  |
| Model_3 | Tree rich. x Stand age | 3510 | 1 | 3.200 | 0.073 | . |
| Model_4 | Stand vol. | 3500 | 1 | 11.900 | <0.001 | *** |
| Model_5 | Stand age x Stand vol. | 3460 | 1 | 41.200 | <0.001 | *** |
| **Host abundance** (N = 792) | | | | | | |
| HA_M | Random factors: plot/site + site + year | 8270 | NA | NA |  |  |
| Model_1 | Tree rich. + Tree FD + Stand vol. + Stand age | 8260 | 4 | 20.600 | <0.001 | *** |
| Model_2 | Slope + Elevation + Eastness + Northness | 8250 | 4 | 21.600 | <0.001 | *** |
| Model_3 | Tree rich. x Stand age | 8250 | 1 | 0.017 | 0.897 |  |
| Model_4 | Stand vol. x Stand age | 8200 | 1 | 51.400 | <0.001 | *** |
| **Host abundance – design + stand biomass** (N = 792) | | | | | | |
| HA_M | Random factors: plot/site + site + year | 8270 | NA | NA |  |  |
| Model_1 | Tree rich. | 8270 | 1 | 9.430 | 0.002 | ** |
| Model_2 | Stand age | 8270 | 1 | 1.230 | 0.268 |  |
| Model_3 | Tree rich. x Stand age | 8270 | 1 | 0.409 | 0.523 |  |
| Model_4 | Stand vol. | 8260 | 1 | 5.410 | 0.020 | * |
| Model_5 | Stand age x Stand vol. | 8210 | 1 | 54.800 | <0.001 | *** |
| **Parasitoid species richness** (N = 792) | | | | | | |
| ER_M | Random factors: plot/site + site + year | 3190 | NA | NA |  |  |
| Model_1 | Tree rich. + Tree FD + Stand vol. + Stand age | 3160 | 4 | 34.400 | <0.001 | *** |
| Model_2 | Host abund. + Host rich. | 2890 | 2 | 279.000 | <0.001 | *** |
| Model_3 | Tree rich. x Stand age | 2890 | 1 | 0.011 | 0.918 |  |
| Model_4 | Stand vol. x Stand age | 2890 | 1 | 1.070 | 0.302 |  |
| Model_5 | Stand age x Host rich. | 2880 | 1 | 8.010 | 0.005 | ** |
| Model_6 | Stand age x Host abund. | 2870 | 1 | 10.100 | 0.001 | ** |
| **Parasitoid species richness – design + stand biomass** (N = 792) | | | | | | |
| ER_M | Random factors: plot/site + site + year | 3190 | NA | NA |  |  |
| Model_1 | Tree rich. | 3170 | 1 | 15.60 | <0.001 | *** |
| Model_2 | Stand age | 3170 | 1 | 1.51 | 0.219 |  |
| Model_3 | Tree rich. x Stand age | 3170 | 1 | 3.25 | 0.071 | . |
| Model_4 | Stand vol. | 3160 | 1 | 13.50 | <0.001 | *** |
| Model_5 | Stand age x Stand vol. | 3140 | 1 | 26.70 | <0.001 | *** |
| **Parasitoid abundance** (N = 792) | | | | | | |
| EA_M | Random factors: plot/site + site + year | 5390 | NA | NA |  |  |
| Model_1 | Tree rich. + Tree FD + Stand vol. + Stand age | 5360 | 4 | 41.600 | <0.001 | *** |
| Model_2 | Host abund. + Host rich. | 5040 | 2 | 318.000 | <0.001 | *** |
| Model_3 | Par. rich. | 4700 | 1 | 345.000 | <0.001 | *** |
| Model_4 | Tree rich. x Stand age | 4700 | 1 | 0.394 | 0.530 |  |
| Model_5 | Stand vol. x Stand age | 4700 | 1 | 5.180 | 0.023 | * |
| Model_6 | Stand age x Par. rich. | 4690 | 1 | 10.100 | 0.002 | ** |
| **Parasitoid abundance – design + stand biomass** (N = 792) | | | | | | |
| EA_M | Random factors: plot/site + site + year | 5390 | NA | NA |  |  |
| Model_1 | Tree rich. | 5380 | 1 | 16.300 | <0.001 | *** |
| Model_2 | Stand age | 5380 | 1 | 0.012 | 0.914 |  |
| Model_3 | Tree rich. x Stand age | 5370 | 1 | 6.940 | 0.008 | ** |
| Model_4 | Stand vol. | 5360 | 1 | 17.800 | <0.001 | *** |
| Model_5 | Stand age x Stand vol. | 5340 | 1 | 18.300 | <0.001 | *** |
| **Parasitism rate** (N = 792) | | | | | | |
| PRT_M | Random factors: plot/site + site + year | 4910 | NA | NA |  |  |
| Model_1 | Tree rich. + Tree FD + Stand vol. + Stand age | 4880 | 3 | 521.00 | <0.001 | *** |
| Model_2 | Host abund. + Host rich. + Par. rich. | 4600 | 3 | 279.00 | <0.001 | *** |
| Model_3 | Host abund. x Host rich. | 4600 | 1 | 10.70 | 0.001 | ** |
| Model_4 | Stand age x Host rich. | 4590 | 1 | 6.58 | 0.010 | * |
| Model_5 | Stand age x Host abund. | 4590 | 1 | 4.48 | 0.034 | * |
| Model_6 | Stand age x Par. rich. | 4590 | 1 | 4.34 | 0.037 | * |
| Model_7 | Stand vol. x Par. rich. | 4580 | 1 | 12.60 | <0.001 | *** |
| **Parasitism rate – design + stand biomass** (N = 792) | | | | | | |
| PRT_M | Random factors: plot/site + site + year | 4910 | NA | NA |  |  |
| Model_1 | Tree rich. | 4900 | 0 | 491.000 | <0.001 | *** |
| Model_2 | Stand age | 4900 | 1 | 0.129 | 0.720 |  |
| Model_3 | Tree rich. x Stand age | 4900 | 1 | 7.920 | 0.005 | ** |
| Model_4 | Stand vol. | 4880 | 1 | 22.500 | <0.001 | *** |
| Model_5 | Stand age x Stand vol. | 4870 | 1 | 3.960 | 0.047 | * |
| **Parasitism rate – focal parasitoid co-occurrence + network structure** (n = 448) | | | | | | |
| PRT_M | Random factors: plot/site + site + year | 3000 | NA | NA |  |  |
| Model_1 | Tree rich. + Tree FD + Stand vol. + Stand age | 3000 | 4 | 14.5 | 0.006 | ** |
| Model_2 | Host abund. + Host rich. + Par. rich. | 2850 | 3 | 150.0 | <0.001 | *** |
| Model_3 | Focal par. rich. | 2840 | 1 | 16.7 | <0.001 | *** |
| Model_4 | Niche ov. | 2830 | 1 | 13.3 | <0.001 | *** |
| **Niche overlap** (n = 448) | | | | | | |
| NO_M | Random factors: plot/site + site + year | 43.80 | NA | NA |  |  |
| Model_1 | Host_rich. + Enemy_rich. | 24.50 | 2 | 23.40 | <0.001 | *** |
| Model_2 | Host_abund. | 19.40 | 1 | 7.12 | 0.008 | ** |
| Model_3 | sc_logtr + Forest_age | 12.10 | 2 | 11.20 | 0.004 | ** |
| Model_4 | sc_logtr x Forest_age | 9.62 | 1 | 4.50 | 0.034 | * |
| Model_5 | sc_frich | -38.90 | 1 | 50.60 | <0.001 | *** |

**Table S7: Sensitivity analyses of generalized linear mixed models.** Models were refitted to assess the robustness to alternative distribution families and nonlinear temporal effects. For each response variable, the table reports fixed-effect estimates, standard errors, test statistics and P values from sensitivity models.

| **Term** | **Estimate** | **Std. Error** | **Statistic** | **P value** | **Sig.** |
| --- | --- | --- | --- | --- | --- |
| **Host species richness – Poisson distribution** – AIC 3360 (N = 792) | | | | | |
| (Intercept) | 1.73 | 0.077 | 22.6 | <0.001 | *** |
| Tree richness | 0.053 | 0.020 | 2.65 | 0.008 | ** |
| Tree FD | 0.003 | 0.019 | 0.155 | 0.877 |  |
| Stand volume | 0.115 | 0.027 | 4.20 | <0.001 | *** |
| Stand age | -0.075 | 0.050 | -1.51 | 0.132 |  |
| Host abundance | 0.185 | 0.016 | 11.5 | <0.001 | *** |
| Slope | 0.021 | 0.017 | 1.24 | 0.213 |  |
| Elevation | -0.038 | 0.022 | -1.77 | 0.076 | . |
| Eastness | 0.008 | 0.016 | 0.501 | 0.616 |  |
| Northness | -0.008 | 0.016 | -0.481 | 0.630 |  |
| Tree richness x Stand age | 0.015 | 0.016 | 0.934 | 0.350 |  |
| Stand volume x Stand age | -0.068 | 0.023 | -2.89 | 0.004 | ** |
| **Host species richness – non-linear temporal dynamics** – AIC 3290 (N = 792) | | | | | |
| (Intercept) | 1.64 | 0.077 | 21.1 | <0.001 | *** |
| Tree richness | 0.060 | 0.017 | 3.56 | <0.001 | *** |
| Tree FD | 0.0008 | 0.016 | 0.051 | 0.959 |  |
| Stand volume | 0.126 | 0.023 | 5.38 | <0.001 | *** |
| Stand age | -0.066 | 0.040 | -1.64 | 0.100 |  |
| I(Stand age^2) | 0.115 | 0.034 | 3.40 | <0.001 | *** |
| Host abundance | 0.18 | 0.013 | 13.3 | <0.001 | *** |
| Slope | 0.023 | 0.014 | 1.66 | 0.097 | . |
| Elevation | -0.042 | 0.018 | -2.36 | 0.018 | * |
| Eastness | 0.0081 | 0.014 | 0.591 | 0.555 |  |
| Northness | -0.011 | 0.014 | -0.776 | 0.438 |  |
| Tree richness x Stand age | 0.016 | 0.013 | 1.31 | 0.191 |  |
| Stand volume x Stand age | -0.103 | 0.022 | -4.74 | <0.001 | *** |
| **Host abundance – Negative binomial distribution** – AIC 8210 (N = 792) | | | | | |
| (Intercept) | 4.49 | 0.166 | 27.0 | <0.001 | *** |
| Tree richness | 0.073 | 0.042 | 1.74 | 0.082 | . |
| Tree FD | 0.084 | 0.039 | 2.17 | 0.030 | * |
| Stand volume | 0.322 | 0.055 | 5.81 | <0.001 | *** |
| Stand age | -0.099 | 0.118 | -0.835 | 0.404 |  |
| Slope | 0.077 | 0.034 | 2.25 | 0.024 | * |
| Elevation | -0.18 | 0.045 | -4.01 | <0.001 | *** |
| Eastness | 0.0008 | 0.034 | 0.022 | 0.982 |  |
| Northness | -0.072 | 0.033 | -2.15 | 0.032 | * |
| Tree richness x Stand age | -0.005 | 0.022 | -0.215 | 0.830 |  |
| Stand volume x Stand age | -0.265 | 0.038 | -6.91 | <0.001 | *** |
| **Host abundance – non-linear temporal dynamics** – AIC 8200 (N = 792) | | | | | |
| (Intercept) | 4.38 | 0.158 | 27.8 | <0.001 | *** |
| Tree richness | 0.076 | 0.041 | 1.87 | 0.061 | . |
| Tree FD | 0.102 | 0.038 | 2.69 | 0.007 | ** |
| Stand volume | 0.360 | 0.052 | 6.96 | <0.001 | *** |
| Stand age | -0.098 | 0.100 | -0.976 | 0.329 |  |
| I(Stand age^2) | 0.134 | 0.068 | 1.96 | 0.050 | * |
| Slope | 0.069 | 0.034 | 2.02 | 0.043 | * |
| Elevation | -0.157 | 0.045 | -3.50 | <0.001 | *** |
| Eastness | -0.001 | 0.034 | -0.033 | 0.974 |  |
| Northness | -0.071 | 0.033 | -2.14 | 0.033 | * |
| Tree richness x Stand age | 0.0101 | 0.021 | 0.487 | 0.626 |  |
| Stand volume x Stand age | -0.300 | 0.040 | -7.59 | <0.001 | *** |
| **Parasitoid species richness – Poisson distribution** – AIC 2900 (N = 792) | | | | | |
| (Intercept) | 1.05 | 0.080 | 13.1 | <0.001 | *** |
| Tree richness | 0.067 | 0.026 | 2.58 | 0.010 | ** |
| Tree FD | 0.006 | 0.025 | 0.246 | 0.806 |  |
| Stand volume | 0.111 | 0.038 | 2.94 | 0.003 | ** |
| Stand age | -0.201 | 0.071 | -2.83 | 0.005 | ** |
| Host richness | 0.129 | 0.025 | 5.06 | <0.001 | *** |
| Host abundance | 0.263 | 0.023 | 11.4 | <0.001 | *** |
| Tree richness x Stand age | 0.0064 | 0.020 | 0.323 | 0.747 |  |
| Stand volume x Stand age | -0.009 | 0.031 | -0.282 | 0.778 |  |
| Stand age x Host abundance | -0.062 | 0.022 | -2.80 | 0.005 | ** |
| Stand age x Host richness | -0.022 | 0.024 | -0.921 | 0.357 |  |
| **Parasitoid species richness – non-linear temporal dynamics** – AIC 2870 (N = 792) | | | | | |
| (Intercept) | 0.98 | 0.080 | 12.3 | <0.001 | *** |
| Tree richness | 0.072 | 0.023 | 3.13 | 0.002 | ** |
| Tree FD | 0.004 | 0.022 | 0.20 | 0.838 |  |
| Stand volume | 0.117 | 0.034 | 3.43 | <0.001 | *** |
| Stand age | -0.187 | 0.057 | -3.31 | <0.001 | *** |
| I(Stand age^2) | 0.094 | 0.057 | 1.66 | 0.098 | . |
| Host richness | 0.118 | 0.023 | 5.17 | <0.001 | *** |
| Host abundance | 0.265 | 0.021 | 12.9 | <0.001 | *** |
| Tree richness x Stand age | 0.012 | 0.017 | 0.70 | 0.485 |  |
| Stand volume x Stand age | -0.041 | 0.032 | -1.26 | 0.206 |  |
| Stand age x Host abundance | -0.063 | 0.020 | -3.23 | 0.001 | ** |
| Stand age x Host richness | -0.021 | 0.021 | -1.00 | 0.315 |  |
| **Parasitoid abundance – Negative binomial distribution** – AIC 4760 (N = 792) | | | | | |
| (Intercept) | 2.16 | 0.115 | 18.8 | <0.001 | *** |
| Tree richness | 0.002 | 0.030 | 0.076 | 0.940 |  |
| Tree FD | 0.006 | 0.029 | 0.225 | 0.822 |  |
| Stand volume | 0.130 | 0.032 | 4.00 | <0.001 | *** |
| Stand age | 0.061 | 0.084 | 0.723 | 0.469 |  |
| Host richness | 0.023 | 0.027 | 0.831 | 0.406 |  |
| Host abundance | 0.240 | 0.030 | 7.96 | <0.001 | *** |
| Parasitoid richness | 0.635 | 0.033 | 19.2 | <0.001 | *** |
| Tree richness x Stand age | 0.008 | 0.021 | 0.396 | 0.692 |  |
| Stand age x Parasitoid richness | 0.067 | 0.025 | 2.72 | 0.006 | ** |
| **Parasitoid abundance – non-linear temporal dynamics** – AIC 4690 (N = 792) | | | | | |
| (Intercept) | 2.10 | 0.132 | 15.9 | <0.001 | *** |
| Tree richness | 0.021 | 0.029 | 0.739 | 0.460 |  |
| Tree FD | 0.030 | 0.028 | 1.10 | 0.272 |  |
| Stand volume | 0.125 | 0.031 | 4.06 | <0.001 | *** |
| Stand age | 0.054 | 0.077 | 0.702 | 0.483 |  |
| Host richness | 0.048 | 0.024 | 1.98 | 0.048 | * |
| Host abundance | 0.198 | 0.023 | 8.55 | <0.001 | *** |
| Parasitoid richness | 0.509 | 0.024 | 21.0 | <0.001 | *** |
| I(Stand age^2) | 0.089 | 0.048 | 1.85 | 0.065 | . |
| Tree richness x Stand age | 0.0008 | 0.018 | 0.044 | 0.965 |  |
| Stand age x Parasitoid richness | 0.061 | 0.018 | 3.50 | <0.001 | *** |
| **Parasitism rate – no plot-years with zero parasitism** – AIC 4390 (n = 721) | | | | | |
| (Intercept) | -1.74 | 0.124 | -14.1 | <0.001 | *** |
| Tree richness | 0.009 | 0.029 | 0.307 | 0.758 |  |
| Tree FD | -0.007 | 0.028 | -0.238 | 0.812 |  |
| Stand volume | 0.10 | 0.032 | 3.10 | 0.002 | ** |
| Stand age | 0.039 | 0.081 | 0.479 | 0.632 |  |
| Host abundance | -0.324 | 0.032 | -10.2 | <0.001 | *** |
| Host richness | -0.12 | 0.029 | -4.15 | <0.001 | *** |
| Parasitoid richness | 0.441 | 0.030 | 14.7 | <0.001 | *** |
| Tree richness x Stand age | 0.029 | 0.021 | 1.41 | 0.160 |  |
| Stand age x Parasitoid richness | 0.043 | 0.022 | 1.93 | 0.054 | . |
| **Parasitism rate – parasitoid richness not capped to 10 sp.** – AIC 4610 (N = 792) | | | | | |
| (Intercept) | -1.81 | 0.147 | -12.3 | <0.001 | *** |
| Tree richness | 0.008 | 0.031 | 0.260 | 0.795 |  |
| Tree FD | -0.002 | 0.030 | -0.071 | 0.944 |  |
| Stand volume | 0.134 | 0.034 | 3.88 | <0.001 | *** |
| Stand age | 0.020 | 0.091 | 0.227 | 0.821 |  |
| Host abundance | -0.333 | 0.034 | -9.72 | <0.001 | *** |
| Host richness | -0.080 | 0.030 | -2.62 | 0.009 | ** |
| Parasitoid richness | 0.516 | 0.030 | 16.9 | <0.001 | *** |
| Tree richness x Stand age | 0.014 | 0.022 | 0.64 | 0.522 |  |
| Stand age x Parasitoid richness | 0.089 | 0.022 | 4.0 | <0.001 | *** |
| **Parasitism rate – host abundance not included as predictor** – AIC 4590 (N = 792) | | | | | |
| (Intercept) | -1.82 | 0.139 | -13.1 | <0.001 | *** |
| Tree richness | 0.031 | 0.034 | 0.903 | 0.366 |  |
| Tree FD | -0.035 | 0.033 | -1.06 | 0.290 |  |
| Stand volume | 0.129 | 0.037 | 3.47 | <0.001 | *** |
| Stand age | -0.033 | 0.086 | -0.384 | 0.701 |  |
| Host richness | -0.199 | 0.031 | -6.50 | <0.001 | *** |
| Parasitoid richness | 0.401 | 0.029 | 13.70 | <0.001 | *** |
| Tree richness x Stand age | 0.030 | 0.024 | 1.26 | 0.209 |  |
| Stand age x Parasitoid richness | 0.064 | 0.024 | 2.69 | 0.007 | ** |
| **Parasitism rate – non-linear temporal dynamics** – AIC 4700 (N = 792) | | | | | |
| (Intercept) | -1.95 | 0.146 | -13.4 | <0.001 | *** |
| Tree richness | 0.011 | 0.031 | 0.373 | 0.709 |  |
| Tree FD | -0.009 | 0.029 | -0.322 | 0.748 |  |
| Stand volume | 0.107 | 0.034 | 3.15 | 0.002 | ** |
| Stand age | 0.069 | 0.082 | 0.837 | 0.403 |  |
| I(Stand age^2) | 0.131 | 0.055 | 2.37 | 0.018 | * |
| Host abundance | -0.334 | 0.034 | -9.89 | <0.001 | *** |
| Host richness | -0.091 | 0.030 | -3.05 | 0.002 | ** |
| Parasitoid richness | 0.540 | 0.030 | 17.7 | <0.001 | *** |
| Tree richness x Stand age | 0.020 | 0.022 | 0.894 | 0.371 |  |
| Stand age x Parasitoid richness | 0.076 | 0.022 | 3.38 | <0.001 | *** |
| **Parasitism rate – no plot-years with zero parasitism + non-linear temporal dynamics** – AIC 4390 (n = 721) | | | | | |
| (Intercept) | -1.87 | 0.128 | -14.6 | <0.001 | *** |
| Tree richness | 0.014 | 0.029 | 0.464 | 0.643 |  |
| Tree FD | -0.011 | 0.028 | -0.402 | 0.687 |  |
| Stand volume | 0.082 | 0.033 | 2.52 | 0.012 | * |
| Stand age | 0.070 | 0.074 | 0.953 | 0.341 |  |
| I(Stand age^2) | 0.128 | 0.051 | 2.48 | 0.013 | * |
| Host abundance | -0.316 | 0.032 | -9.95 | <0.001 | *** |
| Host richness | -0.119 | 0.029 | -4.16 | <0.001 | *** |
| Parasitoid richness | 0.44 | 0.030 | 14.7 | <0.001 | *** |
| Tree richness x Stand age | 0.027 | 0.021 | 1.30 | 0.194 |  |
| Stand age x Parasitoid richness | 0.048 | 0.022 | 2.17 | 0.030 | * |
| **Parasitism rate –mediation of tree rich. effect by focal parasitoid species co-occurrence** – AIC 4740 (N = 792) | | | | | |
| (Intercept) | -1.84 | 0.140 | -13.2 | <0.001 | *** |
| Tree richness | 0.024 | 0.027 | 0.903 | 0.367 |  |
| Stand age | -0.129 | 0.103 | -1.25 | 0.211 |  |
| Focal parasitoid richness | 0.366 | 0.029 | 12.8 | <0.001 | *** |
| Tree richness x Stand age | 0.030 | 0.023 | 1.31 | 0.192 |  |
| **Parasitism rate – mediation of par. rich. effect by focal parasitoid species co-occurrence** – AIC 4560 (N = 792) | | | | | |
| (Intercept) | -1.83 | 0.110 | -16.6 | <0.001 | *** |
| Tree richness | 0.0192 | 0.023 | 0.838 | 0.402 |  |
| Stand age | 0.015 | 0.084 | 0.178 | 0.858 |  |
| Parasitoid richness | 0.395 | 0.037 | 10.6 | <0.001 | *** |
| Host abundance | -0.369 | 0.034 | -11.0 | <0.001 | *** |
| Host richness | -0.071 | 0.030 | -2.40 | 0.016 | * |
| Focal parasitoid richness | 0.256 | 0.035 | 7.31 | <0.001 | *** |
| Tree richness x Stand age | 0.032 | 0.021 | 1.52 | 0.129 |  |
| Stand age x Parasitoid richness | 0.037 | 0.023 | 1.62 | 0.105 |  |
| **Niche overlap – mediation by focal parasitoid species co-occurrence** – AIC -38.9 (n = 448) | | | | | |
| (Intercept) | 0.328 | 0.026 | 12.6 | <0.001 | *** |
| Host richness | -0.056 | 0.014 | -4.02 | <0.001 | *** |
| Parasitoid richness | -0.0096 | 0.016 | -0.58 | 0.563 |  |
| Host abundance | 0.042 | 0.015 | 2.91 | 0.004 | ** |
| Tree richness (log2) | 0.022 | 0.012 | 1.74 | 0.082 | . |
| Stand age | 0.022 | 0.017 | 1.26 | 0.209 |  |
| Focal parasitoid richness | 0.114 | 0.016 | 7.19 | <0.001 | *** |

**Table S8: Results of GLMM model performed on host and parasitoid species sample coverage, keeping site/plot and year as random factors.** Only plots with at least one host or one parasitoid detected were considered (respectively).

| **Hosts** | **β** | **SE** | **z** | **p** |
| --- | --- | --- | --- | --- |
| Tree richness | -0.09 | 0.09 | -0.98 | 0.32 |
| Tree FD | 0.04 | 0.08 | 0.47 | 0.64 |
| Stand biomass | -0.05 | 0.09 | -0.53 | 0.59 |
| Stand age | 0.01 | 0.16 | 0.09 | 0.93 |
| **Parasitoids** | **β** | **SE** | **z** | **p** |
| Tree richness | -0.22 | 0.13 | -1.77 | 0.07 |
| Tree FD | -0.001 | 0.12 | -0.01 | 0.99 |
| Stand biomass | -0.20 | 0.13 | -1.56 | 0.12 |
| Stand age | 0.54 | 0.31 | 1.76 | 0.08 |
| Host richness | -0.44 | 0.13 | -3.39 | <0.001 |
| Host abundance | -0.28 | 0.13 | -2.21 | 0.02 |
